# Supplementary material for: Modular MA-XRF Scanner Development in the Multi-Analytical Characterisation of a 17th Century Azulejo from Portugal
Source: MDPI journal article supplement (doi:10.3390/s21051913), 2021-03-09
Supplement: s1 [file s1]

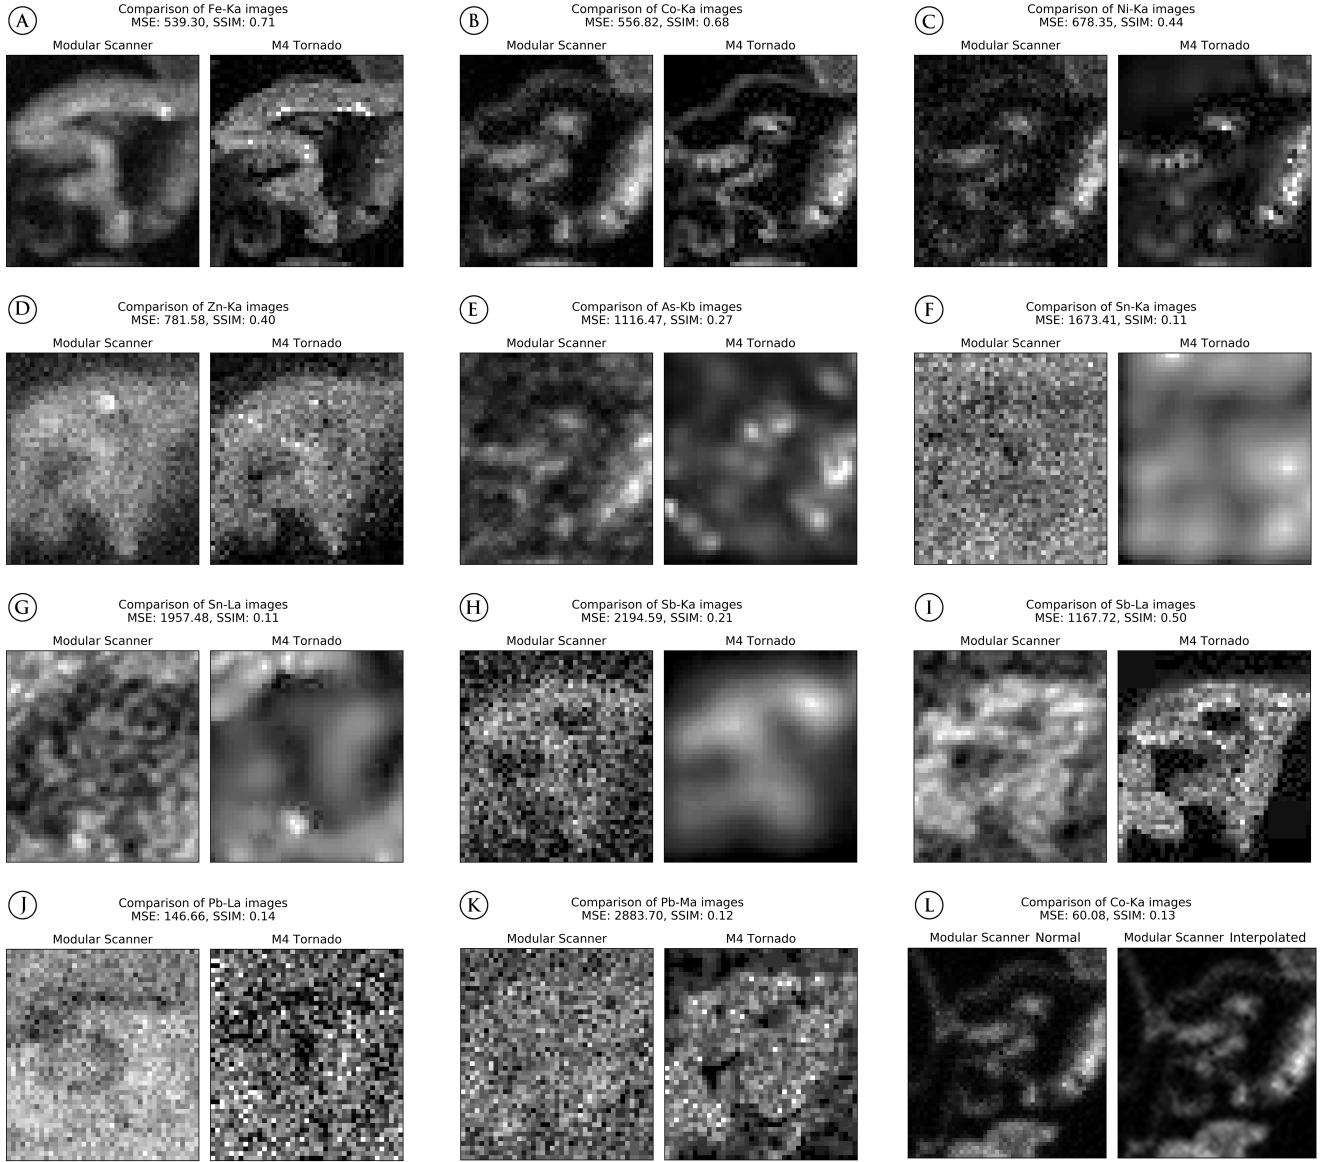

Figure 1: Comparison scores between the Modular Scanner and M4 Tornado images (A-K), and comparison between a same image, interpolated from  $50 \times 53 \text{ px}^2$  to  $1024 \times 1085 \text{ px}^s$  with nearest neighbour (normal) and bicubic (interpolated) algorithms (L).

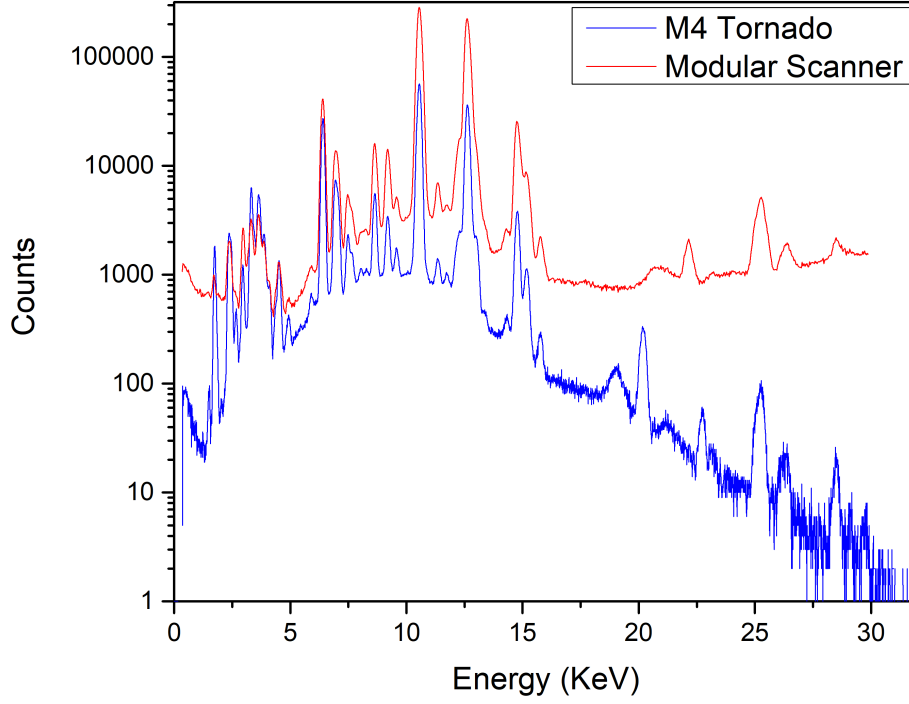

Figure 2: Sum spectra of the scanned regions.

| Spectrum        | Maximum scattering order | Multiplicity of events (Order 1, 2, ..., n) | Layers Count |
|-----------------|--------------------------|---------------------------------------------|--------------|
| Ceramic + White | 3                        | 200, 200, 200                               | 2            |
| Dark Blue       | 3                        | 200, 200, 200                               | 3            |
| Light Blue      | 3                        | 200, 200, 200                               | 3            |
| Yellow          | 3                        | 200, 200, 200                               | 3            |

Table 1: Photoelectric order parameters and layer numbers.

| Spectrum        | Layers thickness (from bulk to surface) |         |         |
|-----------------|-----------------------------------------|---------|---------|
|                 | Layer 1                                 | Layer 2 | Layer 3 |
| Ceramic + White | 0.89 cm                                 | 280 um  | -       |
| Dark Blue       | 0.86 cm                                 | 280 um  | 70 um   |
| Light Blue      | 0.86 cm                                 | 280 um  | 70 um   |
| Yellow          | 0.87 cm                                 | 280 um  | 50 um   |

Table 2: Layers thicknesses.

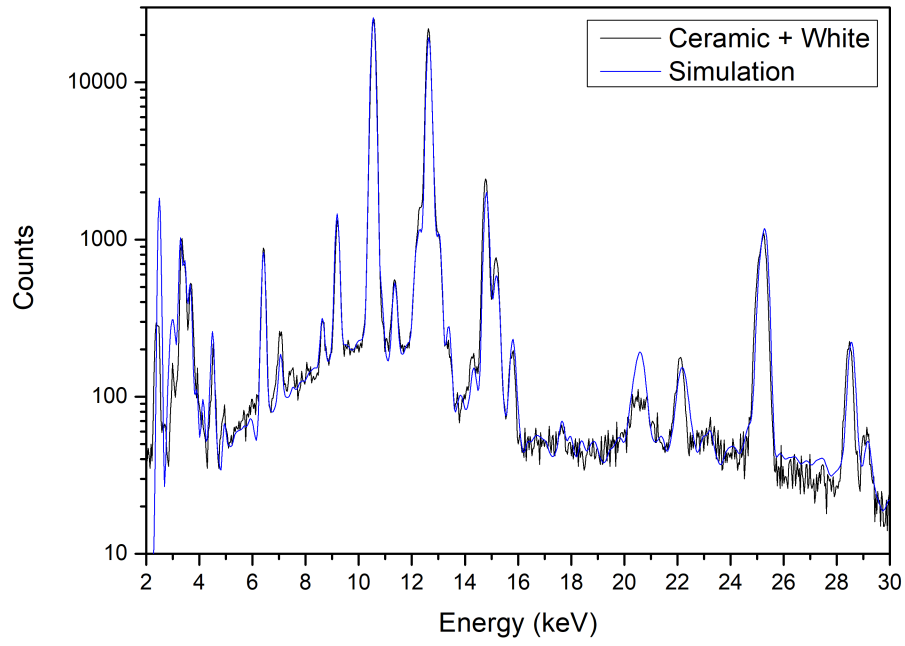

Figure 3: Monte Carlo simulation spectrum and experimental spectrum for the ceramic plus white glaze region.

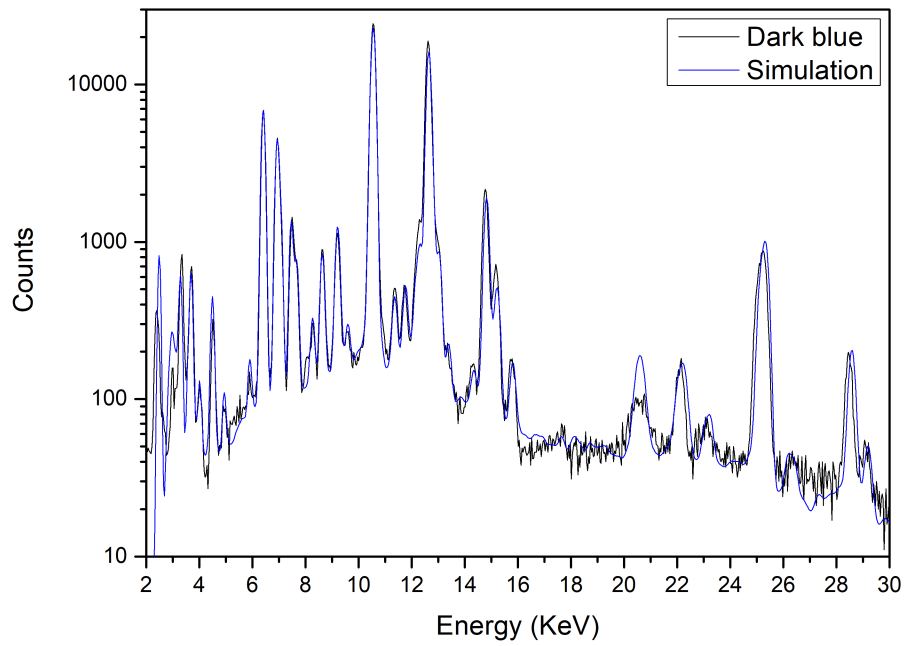

Figure 4: Monte Carlo simulation spectrum and experimental spectrum for the dark blue colour shade.

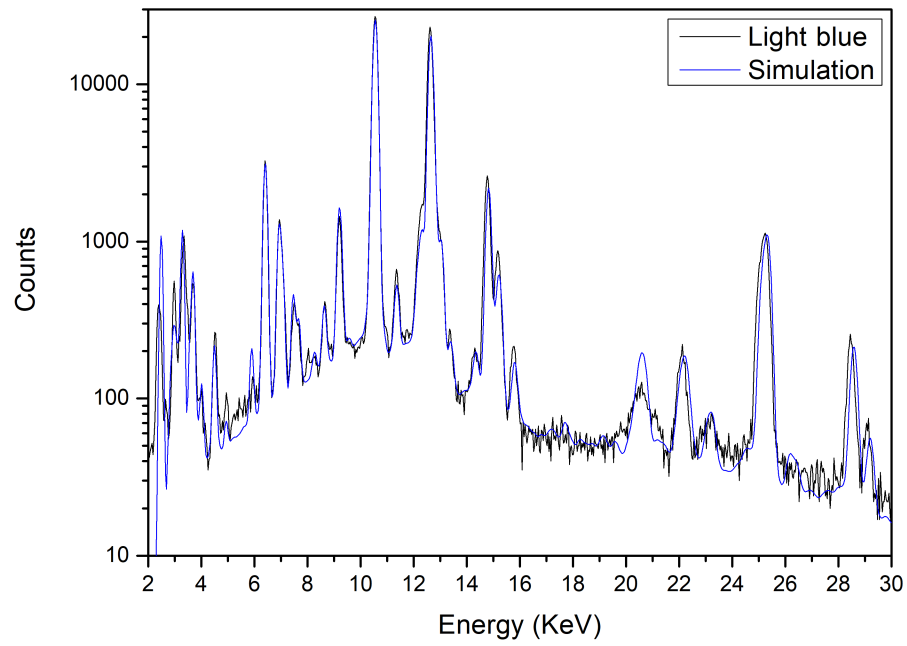

Figure 5: Monte Carlo simulation spectrum and experimental spectrum for the light blue colour shade.

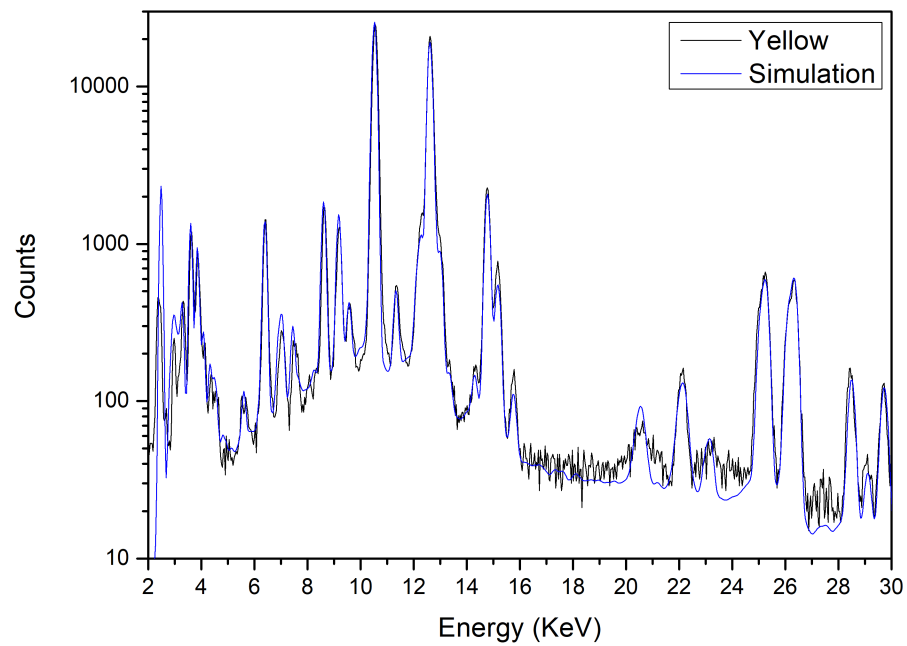

Figure 6: Monte Carlo simulation spectrum and experimental spectrum for the yellow colour.
